# Supplementary figures and images for: Versatile Phase Transfer Method for the Efficient Surface Functionalization of Gold Nanoparticles: Towards Controlled Nanoparticle Dispersion in a Polymer Matrix
Source: Hindawi journal article supplement (doi:10.1155/2016/9058323), 2016-01-01

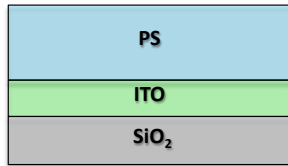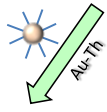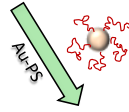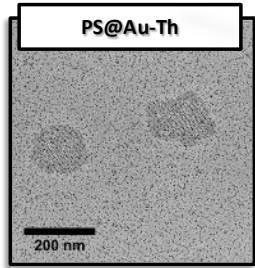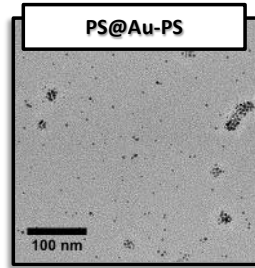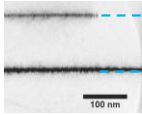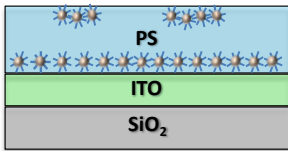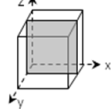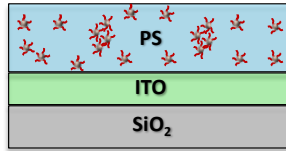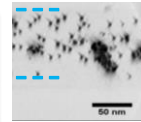

Supplement: f1 [file 9058323.f1.pdf]
